# Supplementary material for: Nanoconfining red phosphorus within MOF-derived hierarchically porous carbon networks for high performance potassium storage
Source: Royal Society of Chemistry journal article supplement (doi:10.1039/d2qm00261b), 2022-01-01
Supplement: d2qm00261b1.pdf [file d2qm00261b1.pdf]

# Supporting Information

## Nanoconfining Red Phosphorus within MOF-derived Hierarchically Porous Carbon Networks for High Performance Potassium Storage

Jinqian Cheng, Zibin Liang, Yingxiao Wu, Degao Wang, Tianjie Qiu, Yanqun Tang, Jinming Shi, Dingguo Xia and Ruqiang Zou\*

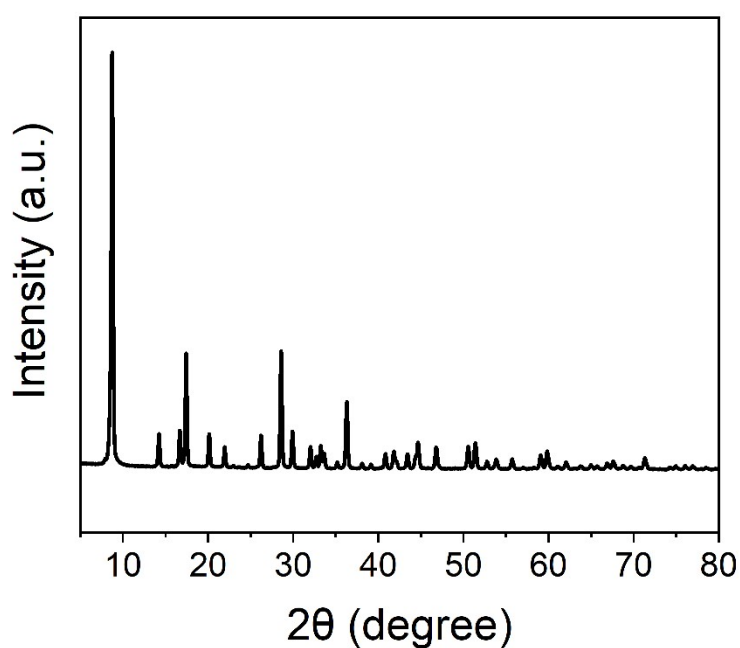

Figure S1. XRD pattern of MET-6.

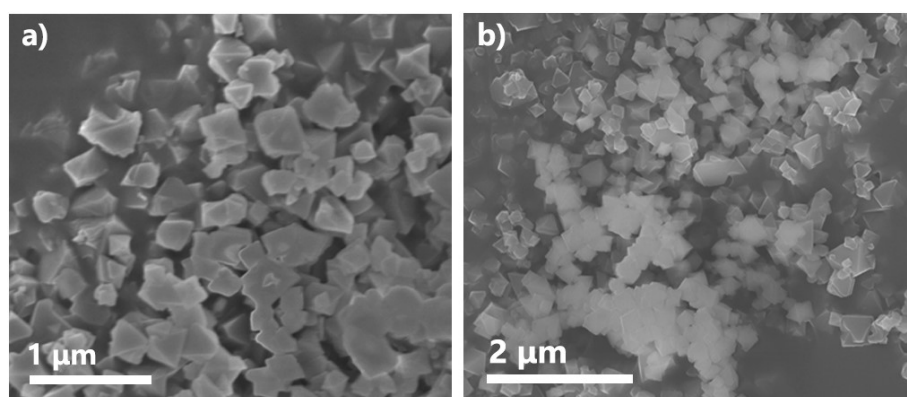

Figure S2. SEM images of MET-6.

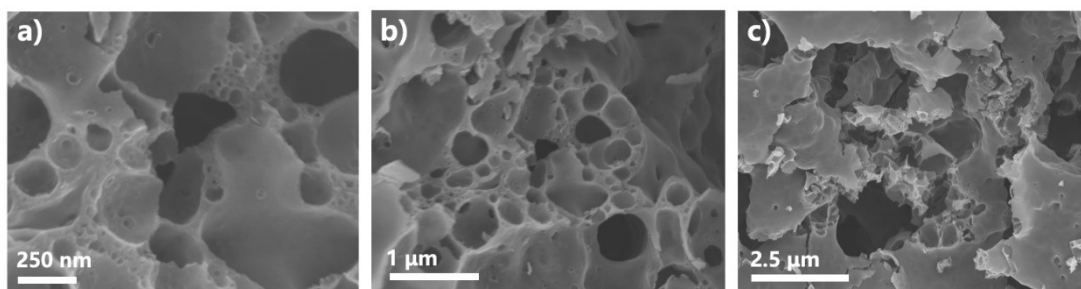

**Figure S3.** SEM images of CN.

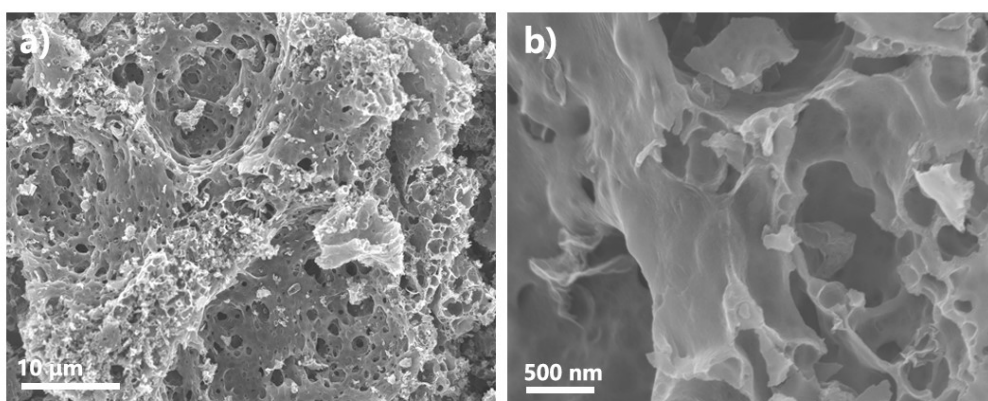

**Figure S4** SEM images of HPCN.

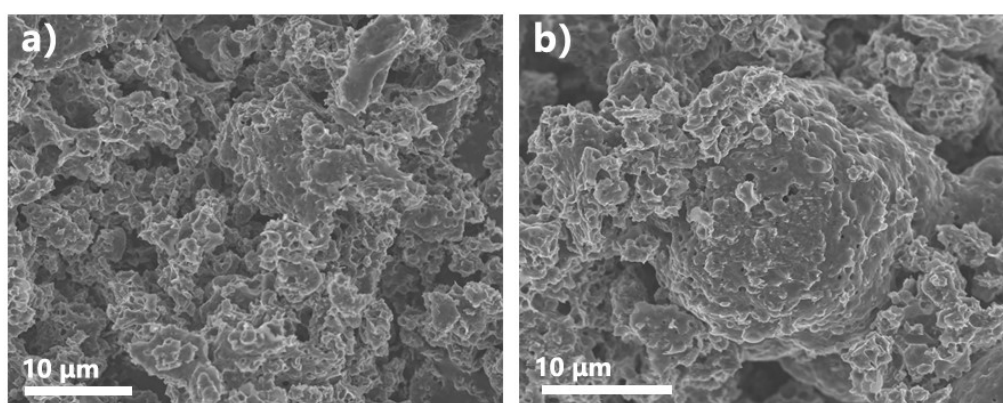

**Figure S5** SEM images of P@CN.

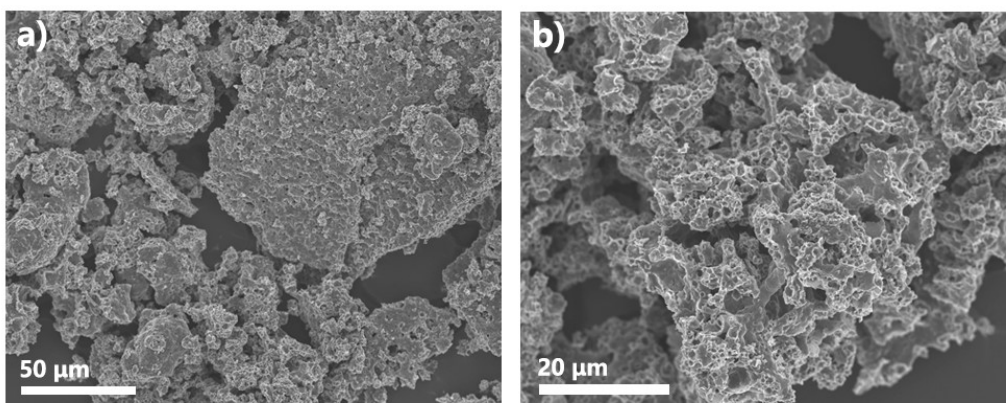

**Figure S6** SEM images of P@HPCN.

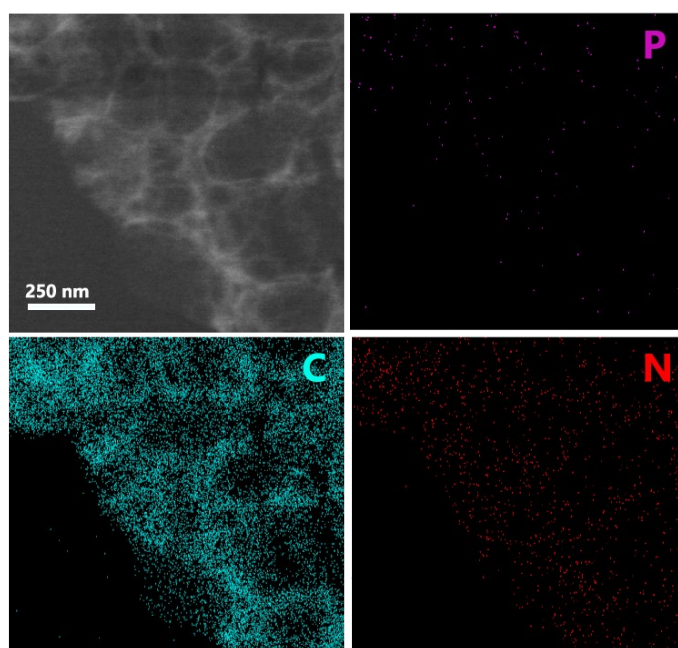

**Figure S7** HAADF-STEM images and corresponding EDS profiles of HPCN.

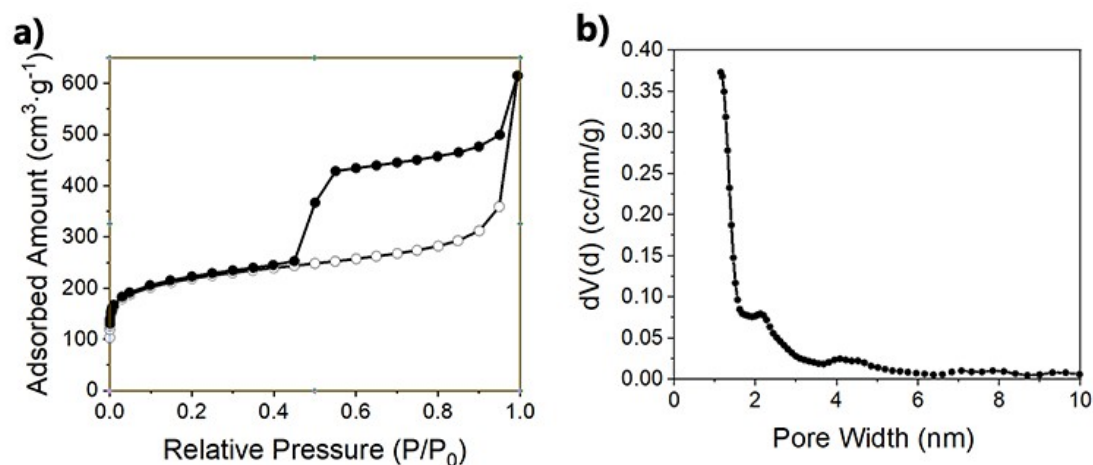

**Figure S8.** (a) Nitrogen sorption isotherm and (b) corresponding pore size distribution of CN.

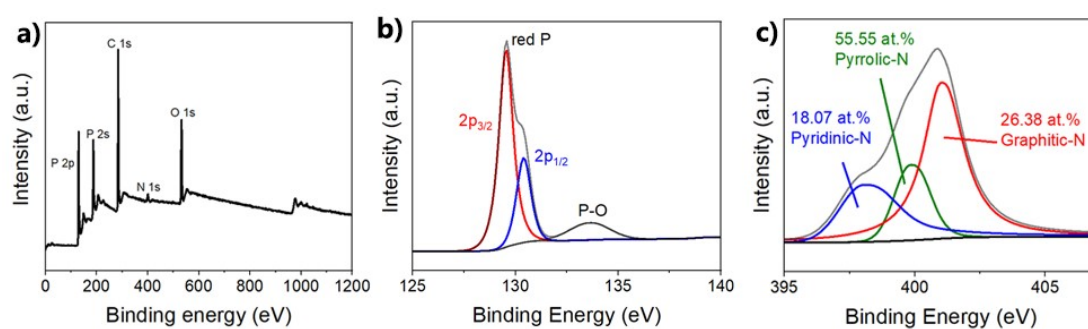

**Figure S9.** (a) Full XPS spectrum, (b) high-resolution P 2p spectrum, and (c) high-resolution N 1s spectrum of P@CN.

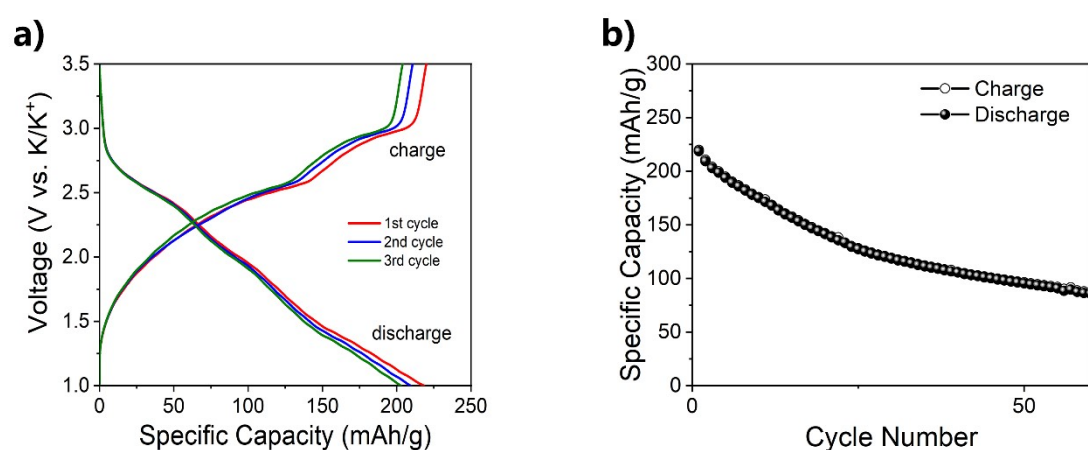

**Figure S10.** (a) GCD profiles at the first several cycles of the resultant full cell. (b) Cycling performance of the resultant full cell at  $1 \text{ A} \cdot \text{g}^{-1}$  over 100 cycles.

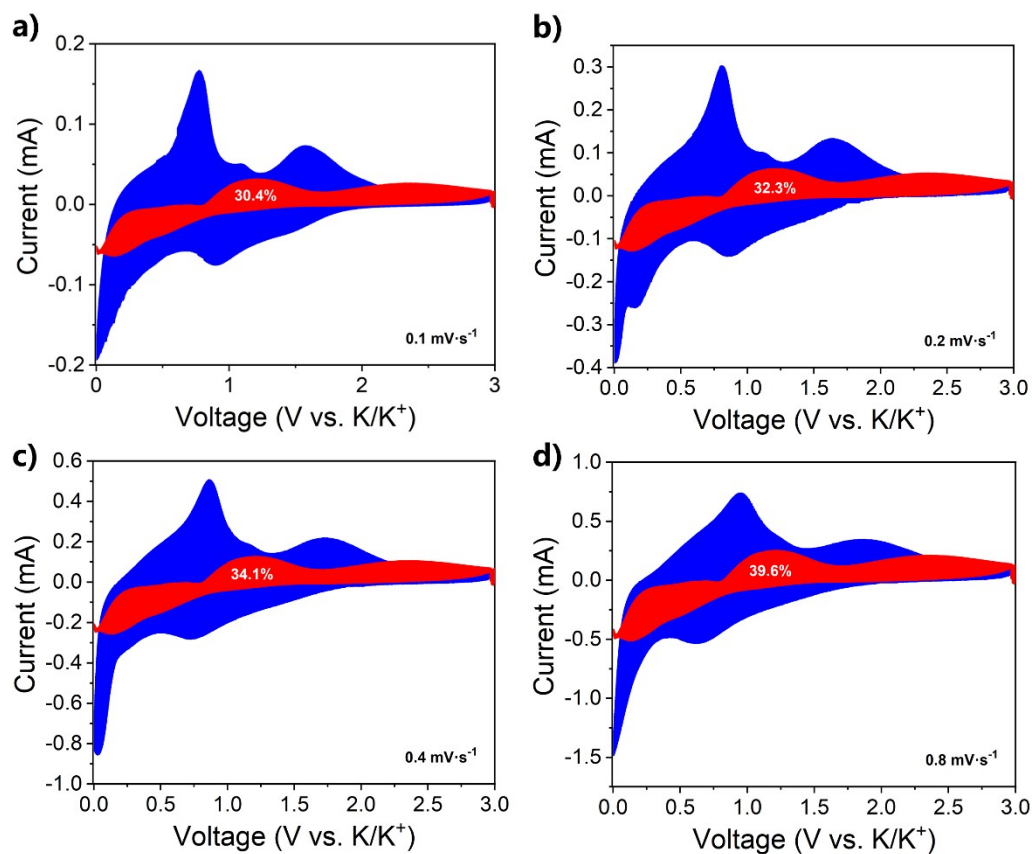

**Figure S11.** CV profiles of P@HPCN demonstrating the contribution of the surface-dependent process at scan rate of (a) 0.1 mV·s<sup>-1</sup>, (b) 0.2 mV·s<sup>-1</sup>, (c) 0.4 mV·s<sup>-1</sup>, (d) 0.8 mV·s<sup>-1</sup>.

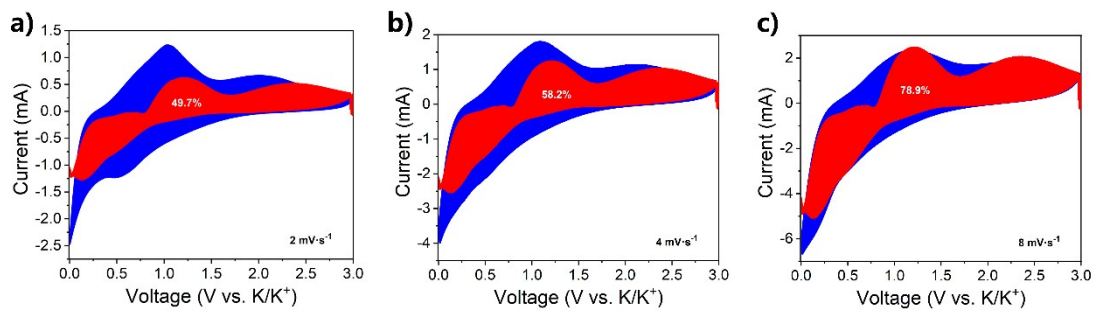

**Figure S12.** CV profiles of P@HPCN demonstrating the contribution of the surface-dependent process at scan rate of (a) 2 mV·s<sup>-1</sup>, (b) 4 mV·s<sup>-1</sup>, (c) 8 mV·s<sup>-1</sup>.

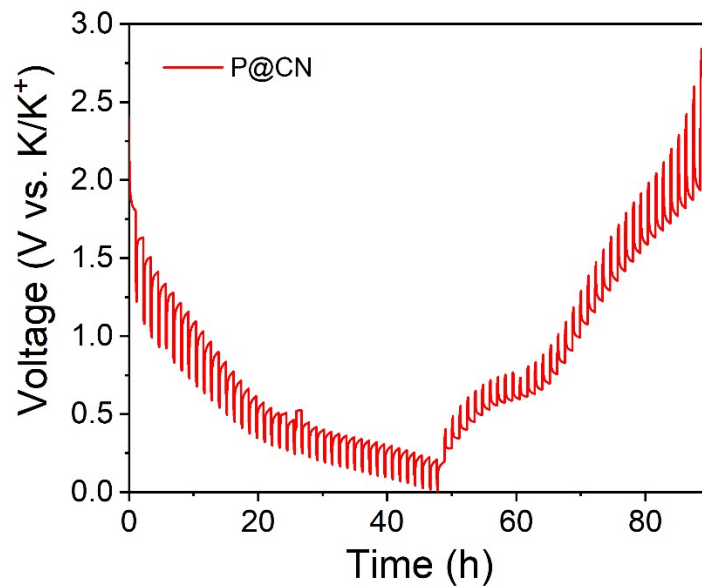

**Figure S13.** GITT profiles of the discharging and charging processes of P@CN.

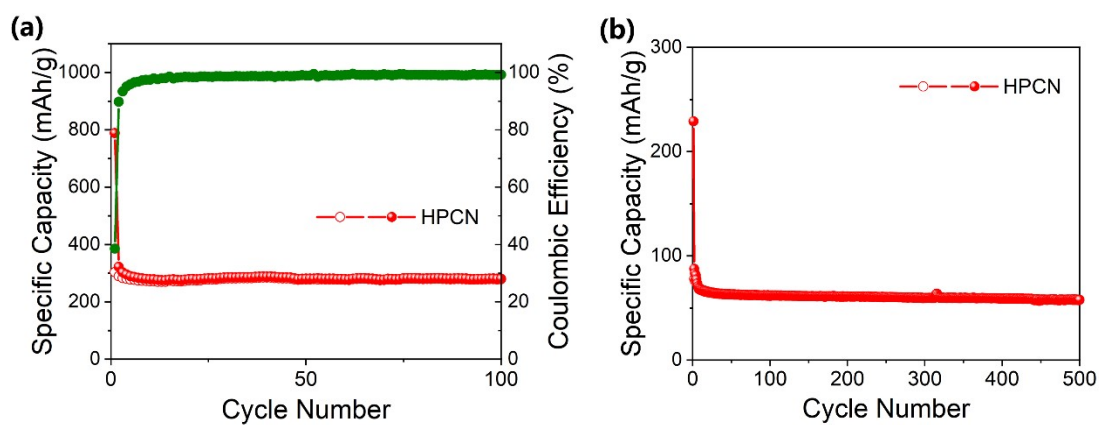

**Figure S14.** Cycling performance of HPCN at (a) 100 mA/g and (b) 1000 mA/g.

**Table S1.** Structure properties and surface chemistry of P@CN and P@HPCN

|      | $I_G/I_D$ | at.% of total N 1s |            |             |
|------|-----------|--------------------|------------|-------------|
|      |           | Pyridinic-N        | Pyrrolic-N | Graphitic-N |
| P@CN | 1.10      | 18.07              | 55.55      | 26.38       |



|        |      |       |   |       |
|--------|------|-------|---|-------|
| P@HPCN | 1.18 | 13.31 | — | 86.69 |
|--------|------|-------|---|-------|

**Table S2.** Structure properties and surface chemistry of CN and HPCN

|      | $S_{\text{BET}}$ (m <sup>2</sup> /g) | $V_{\text{pore}}$<br>(cc/g) | $V_{\text{micropore}}$<br>(cc/g) | Element content (wt.%) |      |       |
|------|--------------------------------------|-----------------------------|----------------------------------|------------------------|------|-------|
|      |                                      |                             |                                  | C                      | N    | H     |
| CN   | 770                                  | 0.954                       | 0.258                            | 77.41                  | 8.06 | 1.383 |
| HPCN | 1051                                 | 1.01                        | 0.376                            | 89.61                  | 3.60 | 0.798 |

**Table S3.** Comparison of the initial Coulombic efficiency, specific capacity at low current and long-term cyclability at large current for recent reported red phosphorus PIB anodes materials.

| Sample name     | Initial Coulombic efficiency | Specific capacity                       | Long-term cyclability                   | References                          |
|-----------------|------------------------------|-----------------------------------------|-----------------------------------------|-------------------------------------|
| P@HPCN          | 70.7%(0.1 A/g)               | 461.8 mAh/g at 0.1 A/g after 100 cycles | 155.7 mAh/g at 1 A/g after 2000 cycles  | This work                           |
| P@AC@PPy        | 58.9%(0.02 A/g)              | 220 mAh/g at 0.05 A/g after 200 cycles  | —                                       | Nano Energy, 2020, 69, 104451       |
| P@TBMC-2.4      | 63.5%(0.05 A/g)              | 396 mAh/g at 0.05 A/g after 75 cycles   | 244 mAh/g at 0.5 A/g after 200 cycles   | Nano Energy, 2018, 52, 1-10         |
| P@CN            | 59%(0.1 A/g)                 | 427.4 mAh/g at 0.1 A/g after 40 cycle   | —                                       | Small, 2018, 14, 1802140            |
| P50@ZCRod-0.025 | 78.5%(0.05 A/g)              | 401.8 mAh/g at 0.1 A/g after 75 cycle   | 150.7 mAh/g at 2.5 A/g after 400 cycles | Nano Energy, 2021, 83, 105797       |
| P-C-2           | 58.8%(0.2 A/g)               | 512 mAh/g at 0.2 A/g after 200 cycle    | 212 mAh/g at 3.2 A/g after 10000 cycles | Nano Energy, 2021, 83, 105772       |
| P@RGO           | 52.6%(0.1 A/g)               | 366.6 mAh/g at 0.1 A/g after 50 cycle   | 253 mAh/g at 0.5 A/g after 500 cycles   | Chem. Eur. J, 2018, 24, 13897-13902 |

---

|                    |              |                                         |                                        |                                   |
|--------------------|--------------|-----------------------------------------|----------------------------------------|-----------------------------------|
| red P@N-<br>PHCNFs | 35%(0.1 A/g) | 650 mAh/g at 0.1<br>A/g after 100 cycle | 282 mAh/g at 5 A/g<br>after 800 cycles | Nano Lett, 2019,<br>19, 1351-1358 |
|--------------------|--------------|-----------------------------------------|----------------------------------------|-----------------------------------|

---
